# Supplementary material for: CW-EPR studies revealed different motional properties and oligomeric states of the integrin β1a transmembrane domain in detergent micelles or liposomes
Source: PubMed Central journal article supplement — Sci Rep. 2015 Jan 19;5:7848. doi: 10.1038/srep07848 (PMC4297981; doi:10.1038/srep07848), 2015-01-19
Supplement: srep07848-s1.pdf [file srep07848-s1.pdf]

## Supplementary Data

### **CW-EPR studies revealed different motional properties and oligomeric states of the integrin $\beta_{1a}$ transmembrane domain in detergent micelles or liposomes**

Lu Yu<sup>1,2,#</sup>, Wei Wang<sup>1,#</sup>, Shenglong Ling<sup>1</sup>, Sanling Liu<sup>2</sup>, Liang Xiao<sup>1</sup>, Yanlong Xin<sup>1</sup>,  
Chaohua Lai<sup>1</sup>, Ying Xiong<sup>1</sup>, Longhua Zhang<sup>1</sup>, Changlin Tian<sup>1,2,\*</sup>

<sup>1</sup> Hefei National Laboratory of Microscale Physical Sciences, School of Life Sciences, University of Science and Technology of China, Hefei, Anhui, 230027, P. R. China;

<sup>2</sup> High Magnetic Field Laboratory, Hefei Institutes of Physical Science, Chinese Academy of Sciences, Hefei, Anhui, 230031, P. R. China.

# These authors contributed equally in this work.

\* To whom correspondence should be addressed (email [cltian@ustc.edu.cn](mailto:cltian@ustc.edu.cn) )

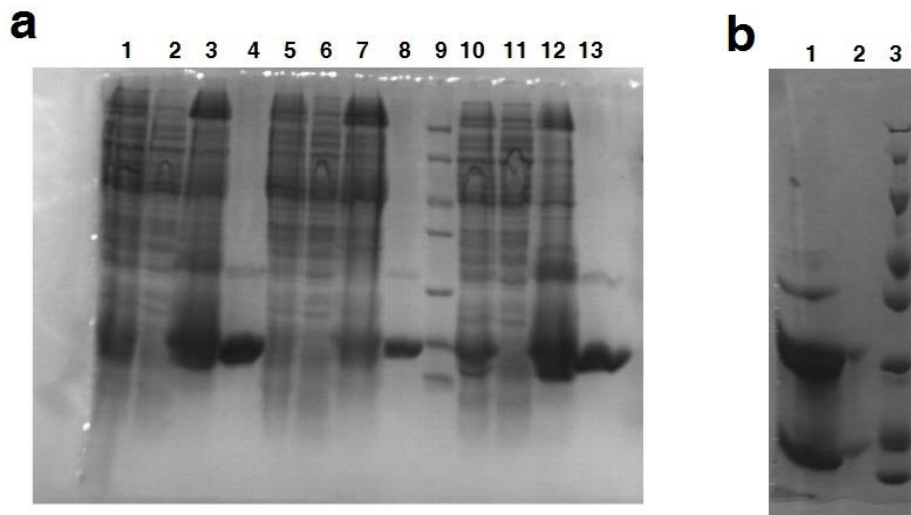

**Supplementary Figure S1:** SDS-PAGE analysis of integrin  $\beta_{1a}$ -TMC in detergent micelles and lipid liposomes. (a) Integrin  $\beta_{1a}$ -TMC samples in detergent micelles. Lane 4: integrin  $\beta_{1a}$  variant G747C; Lane 8: integrin  $\beta_{1a}$  variant L747C; Lane 13: integrin  $\beta_{1a}$  variant L749C; Lane 1-3, 5-7 and 10-12 were samples collected during protein purification (whole cell, supernatant, etc.); Lane 9: protein molecular size marker. (b) Integrin  $\beta_{1a}$ -TMC samples in liposomes. Lane 1: integrin  $\beta_{1a}$  variant L749C; Lane 3: protein molecular size marker. Lane 2 is not used because a small fraction of sample in Lane 1 was leaked into Lane 2.

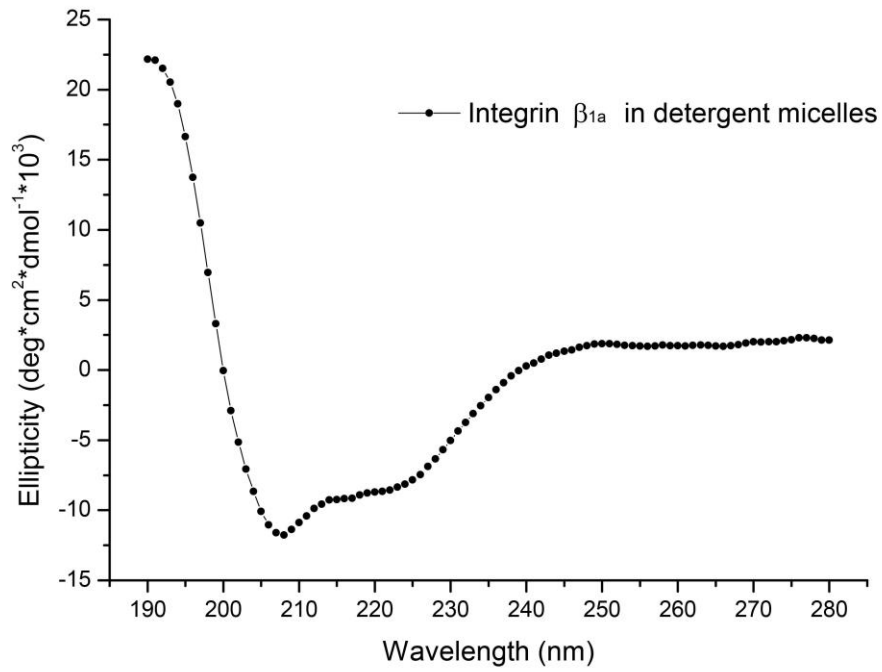

**Supplementary Figure S2:** CD spectra of integrin  $\beta_{1a}$ -L749R1 in LDAO micelles collected at pH 8.0 and at a temperature of 298 K.

|              |     |   |   |   |   |   |   |   |   |   |   |   |   |   |   |   |   |   |   |   |   |   |   |   |   |   |   |   |   |   |   |   |   |   |   |   |   |   |   |   |   |   |   |   |   |   |   |   |   |     |   |     |
|--------------|-----|---|---|---|---|---|---|---|---|---|---|---|---|---|---|---|---|---|---|---|---|---|---|---|---|---|---|---|---|---|---|---|---|---|---|---|---|---|---|---|---|---|---|---|---|---|---|---|---|-----|---|-----|
| $\beta_{1a}$ | 717 | V | V | E | N | P | E | C | P | T | G | P | D | I | I | P | I | V | A | G | V | V | A | G | I | V | L | I | G | L | A | L | L | L | I | W | K | L | L | M | I | I | H | D | R | R | E | F | A | K   | F | 766 |
| $\beta_{1d}$ | 717 | V | V | E | N | P | E | C | P | T | G | P | D | I | I | P | I | V | A | G | V | V | A | G | I | V | L | I | G | L | A | L | L | L | I | W | K | L | L | M | I | I | H | D | R | R | E | F | A | K   | F | 766 |
| $\beta_3$    | 681 | V | V | E | E | P | E | C | P | K | G | P | D | I | L | V | V | L | S | V | M | G | A | I | L | L | I | G | L | A | L | L | I | W | K | L | L | I | T | I | H | D | R | K | E | F | A | K | F | 730 |   |     |

|              |     |   |   |   |   |   |   |   |   |   |   |   |   |   |   |   |   |   |   |   |   |   |   |   |   |   |   |   |   |   |   |   |   |     |   |   |     |
|--------------|-----|---|---|---|---|---|---|---|---|---|---|---|---|---|---|---|---|---|---|---|---|---|---|---|---|---|---|---|---|---|---|---|---|-----|---|---|-----|
| $\beta_{1a}$ | 767 | F | K | E | K | M | N | A | K | W | D | T | G | E | N | P | I | Y | K | S | A | V | T | T | V | V | N | P | K | Y | E | G | K | 798 |   |   |     |
| $\beta_{1d}$ | 767 | E | K | E | K | M | N | A | K | W | D | T | Q | E | N | P | I | Y | K | S | P | I | N | N | F | K | N | P | N | Y | G | R | K | A   | G | L | 801 |
| $\beta_3$    | 731 | E | E | E | R | A | R | A | K | W | D | T | A | N | N | P | L | Y | K | E | A | T | S | T | F | T | N | I | T | Y | R | G | T | 762 |   |   |     |

**Supplementary Figure S3:** Sequence alignment between  $\beta_{1a}$ ,  $\beta_{1d}$  and  $\beta_3$  demonstrated high sequence homology in the transmembrane domain and the cytoplasmic domain.

**Sequence homology analysis among integrin transmembrane and cytoplasmic domains of  $\beta_{1a}$ ,  $\beta_{1d}$  and  $\beta_3$**

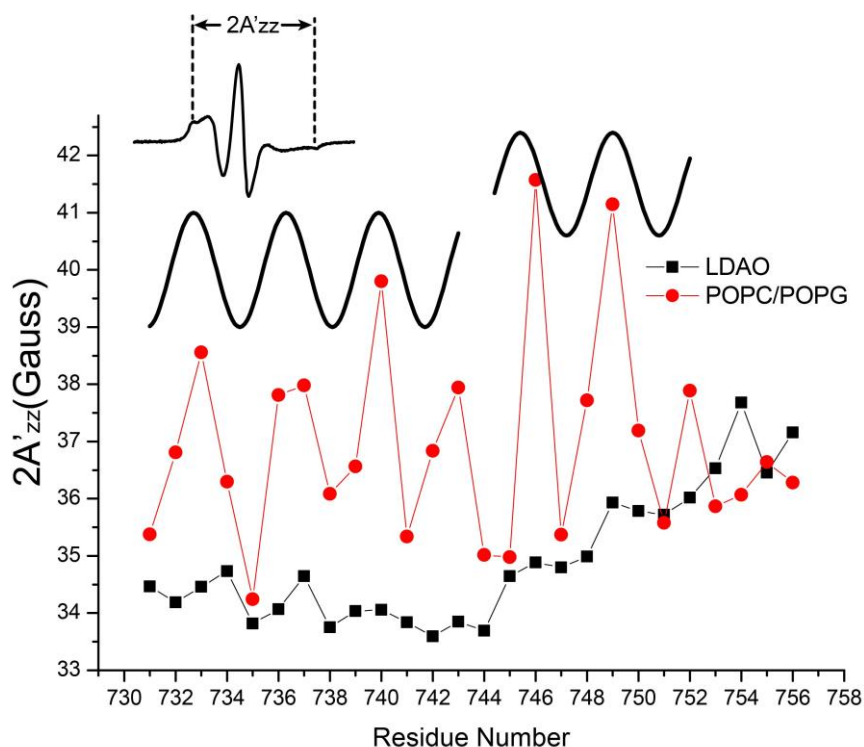

**Supplementary Figure S4:** Plot of the splitting of the outer hyperfine extrema ( $2A'_{zz}$ ) of the EPR spectrum versus the residue number in micelles (black squares) and in liposomes (red dots).  $2A'_{zz}$  was measured as shown in the inset.

#### Splitting of the outer hyperfine extrema ( $2A'_{zz}$ ) of EPR spectra

Interactions of the spin label with its environment (micelles or liposomes) lead to various degrees of immobilization<sup>1</sup>. In the absence of motion (in frozen solution), the principal value of the hyperfine tensor ( $A_{zz}$ ) is readily measured by splitting of the outer hyperfine extrema ( $2A_{zz}$ ; Supplementary Figure S4, inset)<sup>2</sup>. For the EPR spectra of spin labeled residues with well-resolved hyperfine extrema at ambient temperature (298K), changes in the overall splitting between the extrema ( $2A'_{zz}$ , Supplementary Figure S4) provide a measure of changes in mobility, where decreases or increases in  $2A'_{zz}$  reflect an increase or decrease in mobility, respectively.

- 1 Kusnetzow, A. K., Altenbach, C. & Hubbell, W. L. Conformational states and dynamics of rhodopsin in micelles and bilayers. *Biochemistry* **45**, 5538-5550, (2006).
- 2 Gross, A., Columbus, L., Hideg, K., Altenbach, C. & Hubbell, W. L. Structure of the KcsA potassium channel from *Streptomyces lividans*: a site-directed spin labeling study of the second transmembrane segment. *Biochemistry* **38**, 10324-10335, (1999).
